# Supplementary material for: Prediction of sarcopenia using a combination of multiple serum biomarkers
Source: PubMed Central journal article supplement (PMC5988732; doi:10.1038/s41598-018-26617-9), 2018-06-05
Supplement: 41598_2018_26617_MOESM1_ESM.pdf [file 41598_2018_26617_MOESM1_ESM.pdf]

## **Prediction of sarcopenia using a combination of multiple serum biomarkers**

Ju Yeon Kwak<sup>1†</sup>, Hyeoncheol Hwang<sup>2†</sup>, Seon-Kyu Kim<sup>3†</sup>, Jeong Yi Choi<sup>1</sup>, Seung-Min Lee<sup>1</sup>, Hyun Bang<sup>2</sup>, Eun-Soo Kwon<sup>1</sup>, Kwang-Pyo Lee<sup>1,5</sup>, Sun Gun Chung<sup>2,4\*</sup>, and Ki-Sun Kwon<sup>1,6\*</sup>

<sup>1</sup>*Aging Research Center, Korea Research Institute of Bioscience & Biotechnology, 125 Gwahak-ro, Yuseong-gu, Daejeon, 34141, Republic of Korea.* <sup>2</sup>*Department of Rehabilitation Medicine, Seoul National University College of Medicine, Seoul National University Hospital, 101 Daehak-ro, Jongno-gu, Seoul, 03080, Republic of Korea.* <sup>3</sup>*Personalized Genomic Medicine Research Center, Korea Research Institute of Bioscience & Biotechnology, 125 Gwahak-ro, Yuseong-gu, Daejeon, 34141, Republic of Korea.* <sup>4</sup>*Institute of Aging, Seoul National University, 101 Daehak-ro, Jongno-gu, Seoul, 03080, Republic of Korea.* <sup>5</sup>*Department of Biomolecular Science, and* <sup>6</sup>*Functional Genomics, Korea University of Science and Technology (UST), 217 Gajeong-ro, Yuseong-gu, Daejeon, 34113, Republic of Korea*

†equal contribution

\*Correspondence to:

Ki-Sun Kwon, Korea Research Institute of Bioscience and Biotechnology, 125 Gwahak-ro, Yuseong-gu, Daejeon, 34141, Republic of Korea, Tel.: +82-42-860-4143, Fax: +82-42-879-8596, E-mail: kwonks@kribb.re.kr

Sun Gun Chung, Department of Rehabilitation Medicine, College of Medicine, Seoul National University, 101 Daehak-ro, Jongno-gu, Seoul, 03080, Republic of Korea, Tel: +82-2-2072-2560, Fax: +82-2-743-7473, E-mail: suncg@snu.ac.kr

# Supplementary Figure 1.

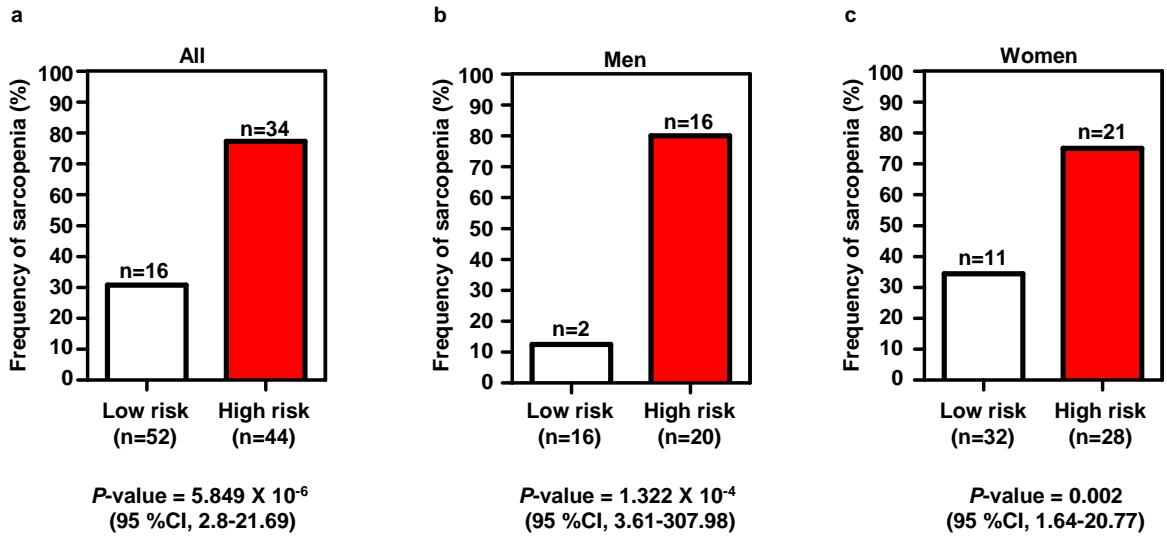

Supplementary Figure 1. Comparison of frequencies of sarcopenia based on ROC analysis.

(a) Comparison of frequencies of sarcopenia in low- and high-risk groups stratified by best cutoff (1.529) obtained from ROC analysis. Bar plots displaying sarcopenia frequencies of low- and high-risk groups in men (b) and women (c). The best cutoff values in men and women were calculated as 1.543 and 1.505, respectively. *P*-value and confidence interval (CI) were obtained using Fisher's exact test.
